# Supplementary material for: Negative Feedback Governs Gonadotrope Frequency-Decoding of Gonadotropin Releasing Hormone Pulse-Frequency
Source: PubMed Central journal article supplement (PMC2746289; doi:10.1371/journal.pone.0007244), 2009-09-29
Supplement: pone.0007244.s001.pdf [file pone.0007244.s001.pdf]

| Variable    | Description        | Initial Concentration (nM) |
|-------------|--------------------|----------------------------|
| MKK         | MAPKK              | 0                          |
| pERK        | Activated ERK1/2   | 0                          |
| pJNK        | Activated JNK      | 0                          |
| pp38        | Activated p38      | 0                          |
| DUSP1       | MAPK phosphatase 1 | 0                          |
| DUSP4       | MAPK phosphatase 2 | 0                          |
| $\alpha$    | $\alpha$ GSU mRNA  | 0                          |
| LH $\beta$  | LH $\beta$ mRNA    | 0                          |
| FSH $\beta$ | FSH $\beta$ mRNA   | 0                          |
