# Supplementary material for: Negative Feedback Governs Gonadotrope Frequency-Decoding of Gonadotropin Releasing Hormone Pulse-Frequency
Source: PubMed Central journal article supplement (PMC2746289; doi:10.1371/journal.pone.0007244), 2009-09-29
Supplement: pone.0007244.s002.pdf [file pone.0007244.s002.pdf]

| Constant       | Description/Value                                                                                                                                                    |
|----------------|----------------------------------------------------------------------------------------------------------------------------------------------------------------------|
| $k_{cat_1}$    | Basic MAPK phosphorylation turnover number/9 min <sup>-1</sup><br>(from DOQCS pathway number 6, and verified in [7])                                                 |
| $km_1$         | Basic MAPK phosphorylation Michaelis constant/46.2963 nM<br>(from DOQCS pathway number 6, and verified in [7])                                                       |
| $k_{cat_{-1}}$ | Basic MAPK dephosphorylation turnover number/60 min <sup>-1</sup><br>(from DOQCS pathway number 32, and verified in [7])                                             |
| $km_{-1}$      | Basic MAPK dephosphorylation Michaelis constant/66.667 nM<br>(from DOQCS pathway number 32, and verified in [7])                                                     |
| $k_{f1}$       | Rate of ERK1/2-induced DUSP production/0.005 min <sup>-1</sup><br>(estimated and adjusted from DOQCS pathway number 35,<br>and taking into account levels of ERK1/2) |
| $\delta_1$     | Rate of DUSP1 degradation/0.024 min <sup>-1</sup><br>(estimated based on [8])                                                                                        |
| $k_{f2}$       | Rate of JNK-induced DUSP production/0.005 min <sup>-1</sup><br>(estimated based on [8])                                                                              |
| $\delta_2$     | Rate of DUSP4 degradation/0.012 min <sup>-1</sup><br>(estimated based on [8])                                                                                        |
| $s_1$          | $\alpha$ GSU mRNA synthesis rate/1 min <sup>-1</sup><br>(arbitrarily chosen)                                                                                         |
| $s_2$          | LH $\beta$ mRNA synthesis rate/0.01 nM <sup>-1</sup> min <sup>-1</sup><br>(arbitrarily chosen, but taking in account the product of two MAPKs)                       |
| $s_3$          | FSH $\beta$ mRNA synthesis rate/0.001 nM <sup>-2</sup> min <sup>-1</sup><br>(arbitrarily chosen, but taking in account the product of three MAPKs)                   |
| ERK            | Total ERK1/2/360 nM<br>(from DOQCS pathway number 6, and verified in [7])                                                                                            |
| JNK            | Total JNK/300 nM<br>(estimated from total amount of ERK1/2, and unpublished observations)                                                                            |
| p38            | Total p38/240 nM<br>(estimated from total amount of ERK1/2, and unpublished observations)                                                                            |
| $\kappa$       | Constant governing exponential decay of MKK/0.333<br>(arbitrarily chosen to give gradual exponential decay)                                                          |
