# Supplementary material for: Negative Feedback Governs Gonadotrope Frequency-Decoding of Gonadotropin Releasing Hormone Pulse-Frequency
Source: PubMed Central journal article supplement (PMC2746289; doi:10.1371/journal.pone.0007244), 2009-09-29
Supplement: pone.0007244.s003.pdf [file pone.0007244.s003.pdf]

| Variable | Description                                   | Initial Concentration (nM) (from [11, 12]) |
|----------|-----------------------------------------------|--------------------------------------------|
| H        | GnRH                                          | 0                                          |
| R        | Free GnRH-R                                   | 0.01                                       |
| HR       | Hormone-receptor complex                      | 0                                          |
| HRRH     | Hormone-receptor dimer complex                | 0                                          |
| GQ       | G <sub>q/11</sub> protein                     | 0.1                                        |
| E        | Effector protein                              | 0                                          |
| IP3      | Inositol 1,4,5-trisphosphate                  | 0                                          |
| CAC      | Cytosolic Ca <sup>2+</sup>                    | 0                                          |
| CAER     | Endoplasmic reticular (ER) Ca <sup>2+</sup>   | 20 μM                                      |
| CHO      | Fraction of open ER Ca <sup>2+</sup> channels | 0                                          |
| pBMK     | Activated pERK5                               | 0                                          |
| BMKSP    | ERK5-specific phosphatase                     | 0                                          |
