# Supplementary material for: Negative Feedback Governs Gonadotrope Frequency-Decoding of Gonadotropin Releasing Hormone Pulse-Frequency
Source: PubMed Central journal article supplement (PMC2746289; doi:10.1371/journal.pone.0007244), 2009-09-29
Supplement: pone.0007244.s004.pdf [file pone.0007244.s004.pdf]

| Constant    | Description/Value (from [11, 12], unless otherwise stated)                                                                                                  |
|-------------|-------------------------------------------------------------------------------------------------------------------------------------------------------------|
| $k_{f3}$    | Rate of ERK5-induced BMKSP production/ $0.005 \text{ min}^{-1}$<br>(estimated based on kinetics of ERK1/2 activation)                                       |
| $\delta_3$  | Rate of BMKSP degradation/ $0.012 \text{ min}^{-1}$<br>(estimated based on kinetics of ERK1/2 activation)                                                   |
| $\hat{s}_3$ | Revised FSH $\beta$ mRNA synthesis rate/ $0.0001 \text{ nM}^{-3} \text{ min}^{-1}$<br>(arbitrarily chosen, but taking in account the product of four MAPKs) |
| $k_1$       | Rate of GnRH binding/ $2.5 \text{ nM}^{-1} \text{ min}^{-1}$                                                                                                |
| $k_{-1}$    | Rate of GnRH-release/ $5 \text{ min}^{-1}$                                                                                                                  |
| $k_2$       | Rate of receptor dimerization/ $2500 \text{ nM}^{-1} \text{ min}^{-1}$                                                                                      |
| $k_{-2}$    | Rate of receptor monomerization/ $5 \text{ min}^{-1}$                                                                                                       |
| $k_3$       | Rate of effector protein production/ $4000 \text{ nM}^{-1} \text{ min}^{-1}$                                                                                |
| $k_{-3}$    | Rate of release of GQ from HRRH/ $200 \text{ min}^{-1}$                                                                                                     |
| $k_5$       | Rate of IP3 production/ $2 \times 10^7 \text{ min}^{-1}$                                                                                                    |
| $k_{-5}$    | Rate of IP3 degradation/ $10 \text{ min}^{-1}$                                                                                                              |
| $k_6$       | Constant governing rate of calcium release from ER/ $1 \text{ min}^{-1}$                                                                                    |
| $k_{66}$    | Constant governing rate of calcium release from ER/ $10 \mu\text{M}^{-1} \text{ min}^{-1}$                                                                  |
| $k_{666}$   | Constant governing rate of calcium release from ER/ $0 \mu\text{M}^{-2} \text{ min}^{-1}$                                                                   |
| $k_{-6}$    | Rate of calcium pumped back to ER/ $5 \text{ min}^{-1}$                                                                                                     |
| $k_7$       | Rate of calcium pumped out of the cell/ $2.2 \mu\text{M} \text{ min}^{-1}$                                                                                  |
| $k_8$       | Constant governing VGCC/ $0.4 \text{ nM}^{-1} \text{ min}^{-1}$                                                                                             |
| $k_{88}$    | Constant governing VGCC/ $0 \mu\text{M}^{-1} \text{ min}^{-1}$                                                                                              |
| $k_{888}$   | Constant governing VGCC/ $0 \mu\text{M}^{-2} \text{ min}^{-1}$                                                                                              |
| $k_9$       | Rate of calcium leaking into the cell/ $0.0002 \text{ min}^{-1}$                                                                                            |
| $k_{11}$    | Basal rate of GnRH-R synthesis/ $8.3 \times 10^{-5} \text{ nM} \text{ min}^{-1}$                                                                            |
| $k_{-11}$   | Rate of GnRH-R degradation/ $8.3 \times 10^{-4} \text{ min}^{-1}$                                                                                           |
| $k_{33}$    | Rate of GQ increase by GnRH/ $2.7 \text{ min}^{-1}$                                                                                                         |
| ERUL        | Resting $\text{Ca}^{2+}$ concentration in ER/ $40 \mu\text{M}$                                                                                              |
| CAE         | External $\text{Ca}^{2+}$ concentration/ $1000 \mu\text{M}$                                                                                                 |
| $\alpha$    | Constant for fraction of open ER channels/ $2 \text{ nM}^{-1}$                                                                                              |
| $\beta$     | Constant for fraction of open ER channel/ $4 \text{ min}^{-1}$                                                                                              |
| BMK         | Total ERK5/ $50 \text{ nM}$<br>(estimated based on total amount of ERK1/2 given by DOQCS, pathway number 6)                                                 |
