# Supplementary material for: Negative Feedback Governs Gonadotrope Frequency-Decoding of Gonadotropin Releasing Hormone Pulse-Frequency
Source: PubMed Central journal article supplement (PMC2746289; doi:10.1371/journal.pone.0007244), 2009-09-29

Unperturbed Full Model (Exponential Pulse)

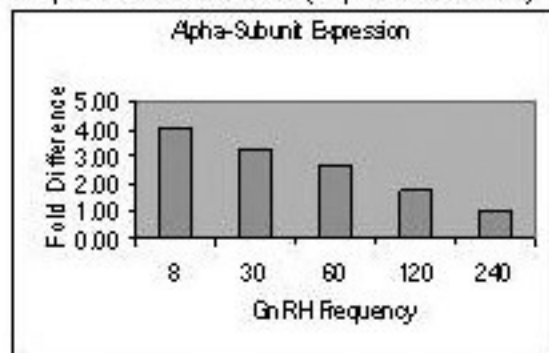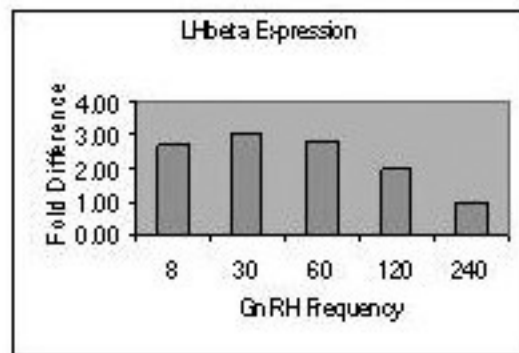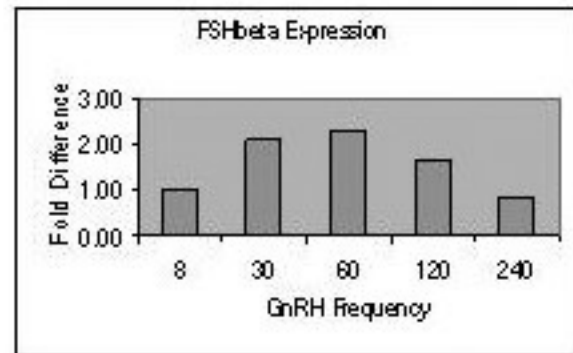

K1+10%

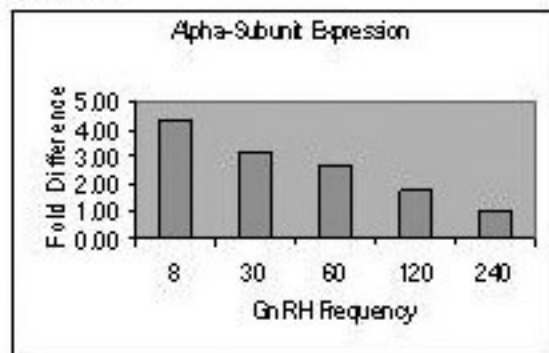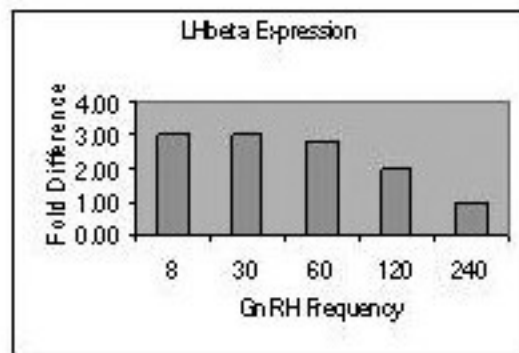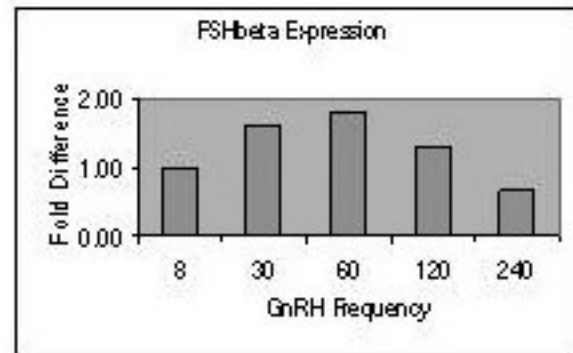

K1-10%

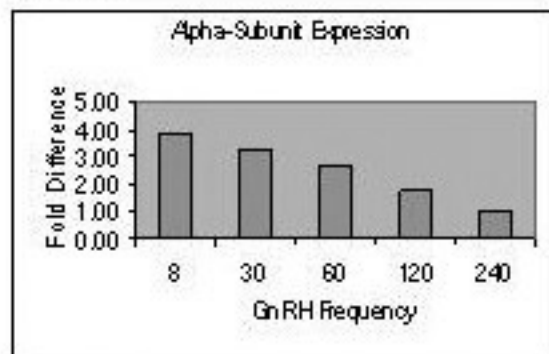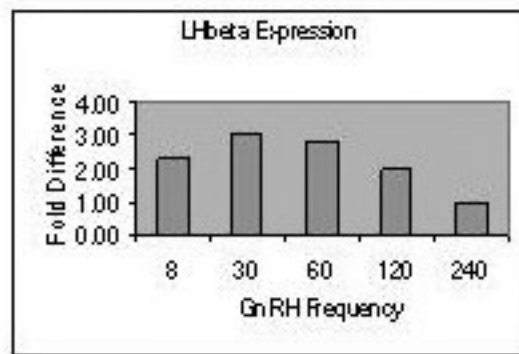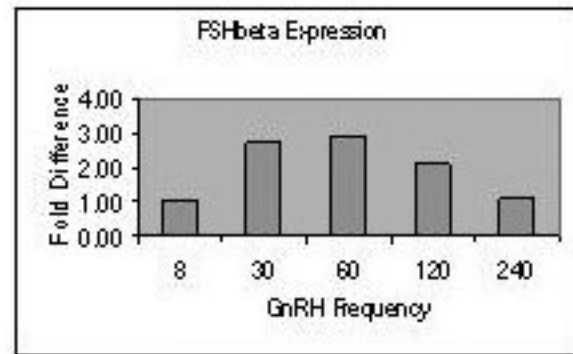

Supplement: pone.0007244.s007.pdf [file pone.0007244.s007.pdf]
